# Supplementary material
Source: Springer Nature journal article supplement (https://www.springermedizin.de/resource/supplementary/12889_2010_3174_MOESM1_ESM.pdf/9488348)
Supplement: MOESM1 [file 9488348]

30,514 participants in the 2005  
Health Barometer survey

```
graph TD; A[30,514 participants in the 2005 Health Barometer survey] --> B[3,842 participants contacted by their mobile]; A --> C[26,672 participants contacted by their landline]; C --> D[8,889 people did not participate in the quality-of-life survey.]; C --> E[17,783 persons were randomly selected to answer the Duke Health Profile questionnaire.]; E --> F[17,733 persons answered the Duke questionnaire];
```

3,842 participants  
contacted by their mobile

26,672 participants  
contacted by their landline

8,889 people did not  
participate in the  
quality-of-life survey.

17,783 persons were  
randomly selected to  
answer the Duke  
Health Profile  
questionnaire.

17,733 persons  
answered the Duke  
questionnaire
